# Supplementary material
Source: publisher figshare collection journal article supplement (https://scielo.figshare.com/articles/dataset/_/14325465)
Supplement: Supplementary file 1 [file Table_1.xls]

## Sheet: Table_1
<b>Reference</b>	<b>Faecal sterols</b>	<b>LABs</b>	<b>Σ-Ahs</b>	<b>Σ-PAHs</b>
	μg-g<sup>-1</sup>	μg-g<sup>-1</sup>	μg-g<sup>-1</sup>	μg-g<sup>-1</sup>
Bícego et al., 1998	n.a	n.a.	0.14-0.58	1.00-32.0
Martins et al., 2002	0.21-10.4	<0.60-11.8	n.a.	n.a.
Martins et al., 2004	n.a	n.a	0.15-13.28	9.45-270.5
Martins et al., 2010	0.01-0.95	1.00-23.0	n.a.	n.a.
Martins et al., 2012	0.01-0.17	1.00-46.5	n.a.	n.a
